# Supplementary material
Source: PubMed Central journal article supplement (PMC3321924)
Supplement: NIHMS367752-supplement-supplement_1.pdf [file NIHMS367752-supplement-supplement_1.pdf]

**Supporting Table 1:**

**Primers used in this study**

| <b>Gene</b>                                                                   | <b>Forward Primer</b>              | <b>Reverse Primer</b>              |
|-------------------------------------------------------------------------------|------------------------------------|------------------------------------|
| <b>Genotyping Primers</b>                                                     |                                    |                                    |
| <i>FLAG-Myd88</i>                                                             | CAGGGCCCATGGACTACAAAGAC<br>GATGACG | CTGGTACCTCAGGGCAGGGACAA<br>AGCCTTG |
| Endogenous <i>Myd88</i> gene                                                  | TGGCATGCCTCCATCATAGTTAACC          | GTCAGAAACAACCACCACCATGC            |
| <i>Neo</i>                                                                    | ATCGCCTTCTATCGCCTTCTTGACG          |                                    |
| <i>Vil-Cre</i>                                                                | GTGTGGGACAGAGAACAAACC              | ACATCTTCAGGTTCTGCGGG               |
| <i>Myd88<sup>fl/fl</sup></i>                                                  | GTTGTGTGTGTCCGACCGT                | GTCAGAAACAACCACCACCATGC            |
| <i>RegIIIγ<sup>+/+</sup></i> allele                                           | GCAGCAGGAAAGCAAGTCCATTCT           | ATGCTCATGCAAGTCAGGGAGGTA           |
| <i>RegIIIγ<sup>-/-</sup></i> allele (+P <sub>gk</sub> -neo)                   | GCAGCAGGAAAGCAAGTCCATTCT           | GAAAGCGAAGGAGCAAAGCTGCTA           |
| <i>RegIIIγ<sup>-/-</sup></i> allele (-P <sub>gk</sub> -neo)                   | GCAGCAGGAAAGCAAGTCCATTCT           | TCAGTGAGAGACGATGCGGCTAAT           |
| <b>Q-PCR Primers</b>                                                          |                                    |                                    |
| 18S rRNA                                                                      | CATTCGAACGTCTGCCCTAT               | CCTGCTGCCTTCCTTGGA                 |
| <i>RegIIIγ</i>                                                                | TTCCTGTCCTCCATGATCAAA              | CATCCACCTCTGTTGGGTTC               |
| <b>Bacterial 16S rRNA gene primers</b>                                        |                                    |                                    |
| Eubacteria (Universal)                                                        | ACTCCTACGGGAGGCAGCAGT              | ATTACCGCGGCTGCTGGC                 |
| Bacteroides                                                                   | GGTTCTGAGAGGAGGTCCC                | CTGCCTCCCGTAGGAGT                  |
| Mouse Intestinal <i>Bacteroides</i> (MIB)                                     | CCAGCAGCCGCGGTAATA                 | CGCATTCCGCATACTTCTC                |
| Lactobacillus/Enterococcus Group (Lact)                                       | AGCAGTAGGGAATCTTCC                 | CACCGCTACACATGGA                   |
| <i>Eubacterium rectale</i> /<br><i>Clostridium coccooides</i><br>group (Erec) | ACTCCTACGGGAGGCAGC                 | GCTTCTTAGTCAGGTACCGTCA             |
| Segmented filamentous<br>bacteria (SFB)                                       | GACGCTGAGGCATGAGAGCA               | GACGGCACGGATTGTTATTC               |

A

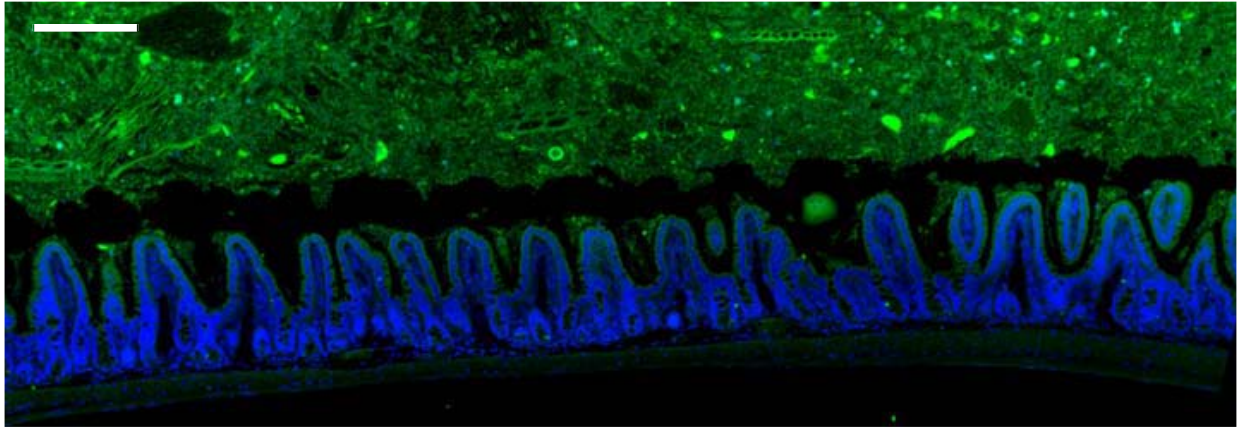

16S rDNA (universal probe) DAPI

B

bacteria-specific probe  
(16S rDNA universal)

non-specific probe

probe-negative  
control

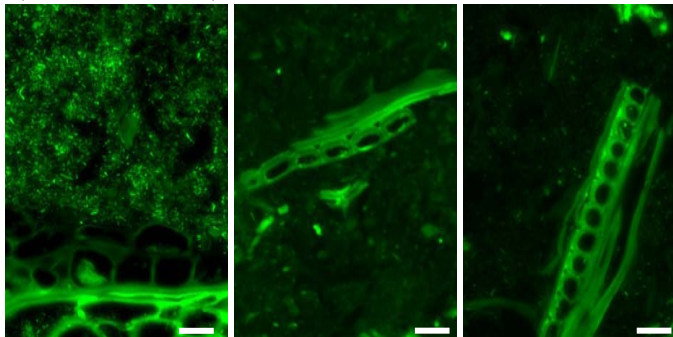

**Figure S1: Physical separation between host and microbiota in the small intestine.** (A) Small intestines of wild-type C57BL/6 mice were prepared for fluorescence *in situ* hybridization by fixation in Carnoy's fixative, which preserves the mucus layer (7). Tissue sections were hybridized to a probe that recognizes the 16S rRNA genes of all bacteria (green), and counterstained with DAPI to visualize nuclei (blue). Scale bar=200  $\mu$ m. (B) FISH analysis of luminal contents using the 16S rDNA universal probe used in (A), a non-specific scrambled probe, or no probe (probe-negative control). The probe-negative control demonstrates autofluorescence of plant materials in the intestinal lumen when visualized in the FITC channel. Scale bars=50  $\mu$ m.

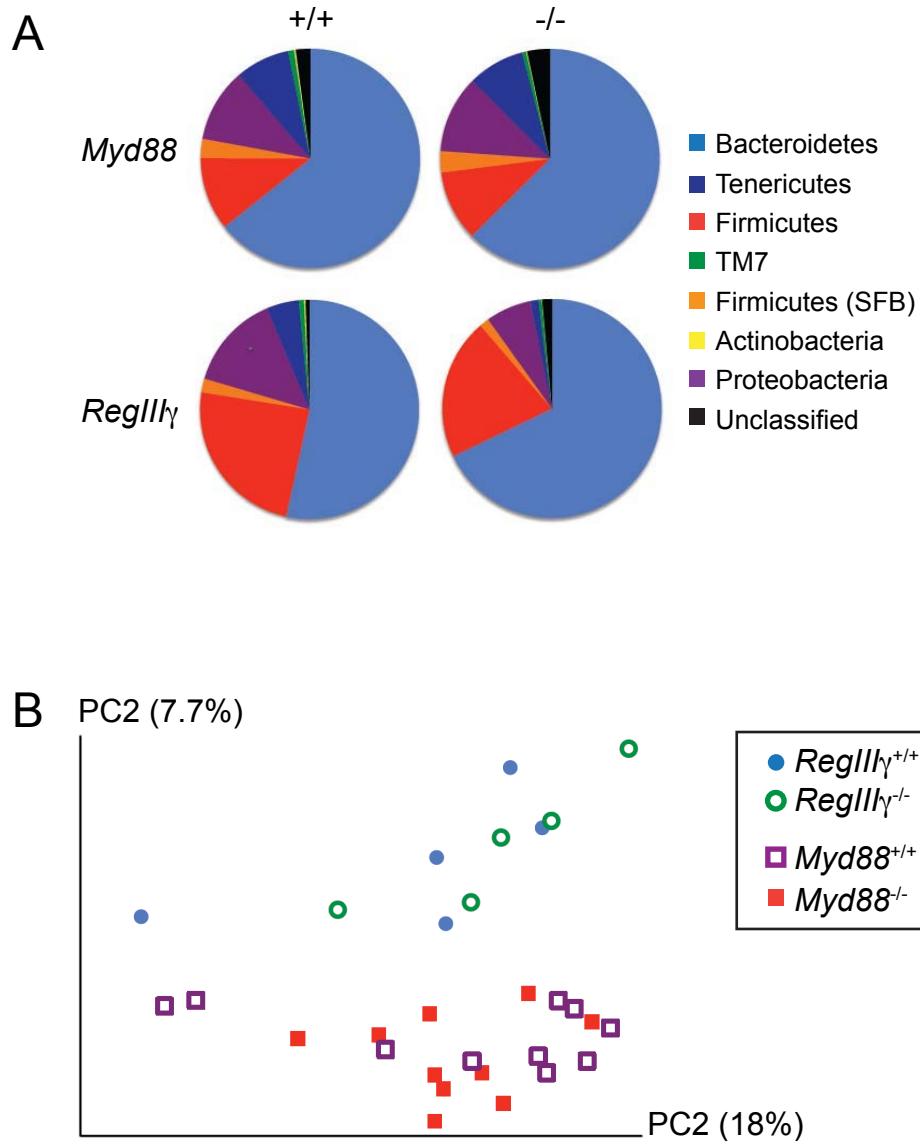

**Figure S2: Luminal community structure in *Myd88*<sup>-/-</sup> and *RegIII $\gamma$* <sup>-/-</sup> mice.**

(A) Mean relative abundances of bacterial phyla from the luminal communities of *Myd88*<sup>-/-</sup>, *RegIII $\gamma$* <sup>-/-</sup>, and wild-type mice. The phylum Firmicutes was divided into SFB and all other Firmicutes. All mice analyzed were the offspring of heterozygous crosses that remained co-housed. Thus, *Myd88*<sup>-/-</sup> and *RegIII $\gamma$* <sup>-/-</sup> mice each have distinct wild-type controls. Plotted values are relative mean sequence abundances of each phylum (6,000 sequences/sample). The mean differences between all phyla in both cohousing groups did not attain statistical significance by t-test, indicating that *Myd88*<sup>-/-</sup> and *RegIII $\gamma$* <sup>-/-</sup> luminal communities are similar to their co-housed wild-type littermates at the phylum level. (B) Comparisons of small intestinal microbiota composition of *RegIII $\gamma$* <sup>-/-</sup>, *Myd88*<sup>-/-</sup> and wild-type mice. Principal Coordinates 1 and 2, from the unweighted UniFrac analyses, are plotted for each sample. Each symbol represents a sample colored by mouse type. The percent variance explained by the principal coordinates is indicated in parentheses. The results show that both *Myd88*<sup>-/-</sup> and *RegIII $\gamma$* <sup>-/-</sup> harbor luminal communities that are similar to their co-housed wild-type littermates. However, there are significant differences between the co-housed groups that are depending on caging but independent of genotype.

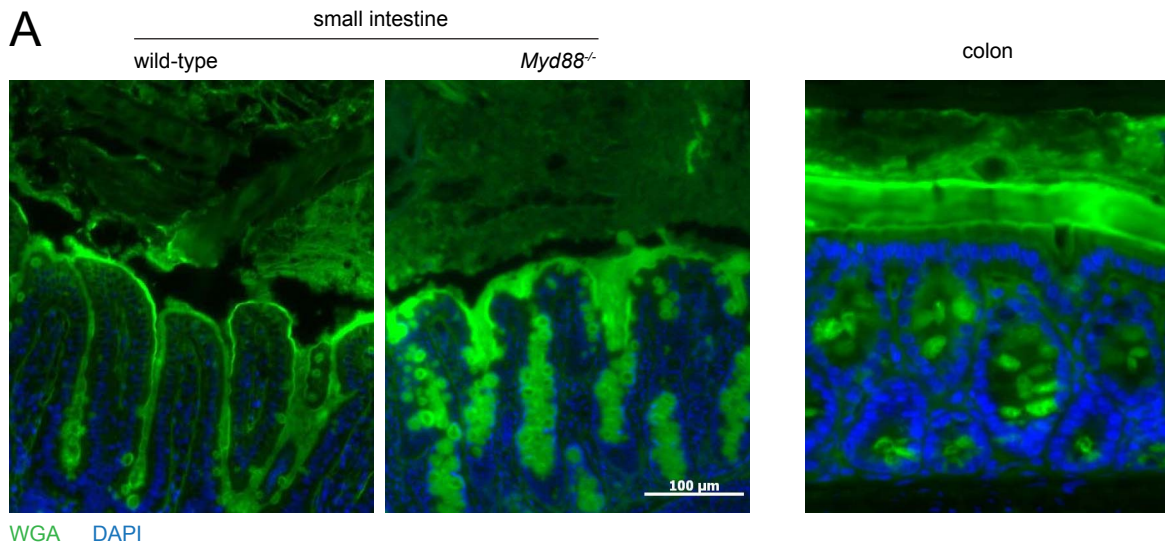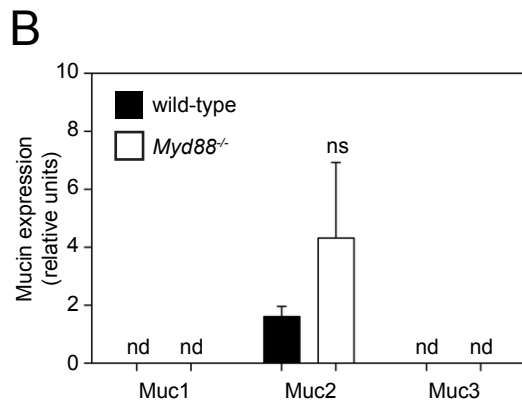

**Figure S3: Small intestinal mucus production in *Myd88*<sup>-/-</sup> mice.**

(A) Small intestinal sections were fixed in Carnoy's fixative, which preserves the mucus layer (7). The sections were stained with wheat germ agglutinin (WGA; green), which recognizes glycan structures on mucin glycoproteins (23). Nuclei were detected with a DAPI counterstain (blue). Colon is shown for comparison, and exhibits a characteristic dense inner mucus layer (5). Scale bars=100 μm.

(B) Q-PCR analysis of small intestinal mucin 2 (*Muc2*) expression. Small intestines were first surveyed for expression of *Muc1*, *Muc2*, and *Muc3*, major mucin components of large intestinal mucus. *Muc1* and *Muc3* mRNAs were not detectable, regardless of mouse genotype, suggesting that they are not major mucin components in the small intestine. *Muc2* was expressed in both wild-type and *Myd88*<sup>-/-</sup> mice (N=3 mice of each genotype). ns, not significant; Error bars, ±SEM; nd, not detected.

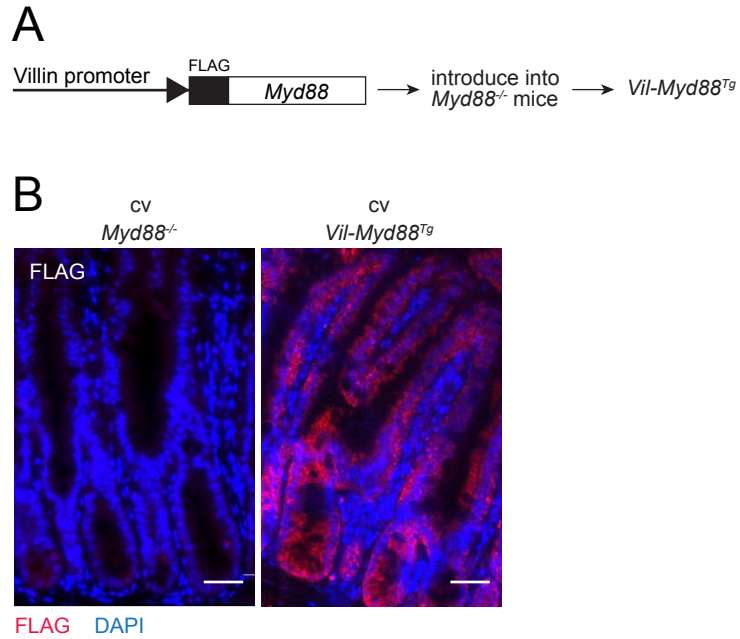

**Figure S4: Generation and analysis of *Vil-Myd88*<sup>Tg</sup> mice.**

(A) A *Myd88* transgene with an N-terminal FLAG epitope fusion was cloned downstream of the epithelial cell-specific *Villin* promoter (8). Transgenic lines were generated and crossed onto *Myd88*<sup>-/-</sup> mice. *Vil-Myd88*<sup>Tg</sup> denotes mice harboring the *Vil-FLAG-Myd88* transgene on a *Myd88*<sup>-/-</sup> background. (B) To detect transgene expression, small intestinal tissues were probed with an anti-FLAG antibody (red), which specifically labeled epithelial cells, and counterstained with DAPI to visualize nuclei (blue). Mice were further analyzed for expression of the MyD88-dependent antibacterial protein RegIIIγ in Figure 2. Scale bars=50 μm. Experimental animals were generated from crosses of *Vil-Myd88*<sup>Tg</sup> animals with *Myd88*<sup>-/-</sup> animals, and co-housed *Vil-Myd88*<sup>Tg</sup> and *Myd88*<sup>-/-</sup> littermates were analyzed.

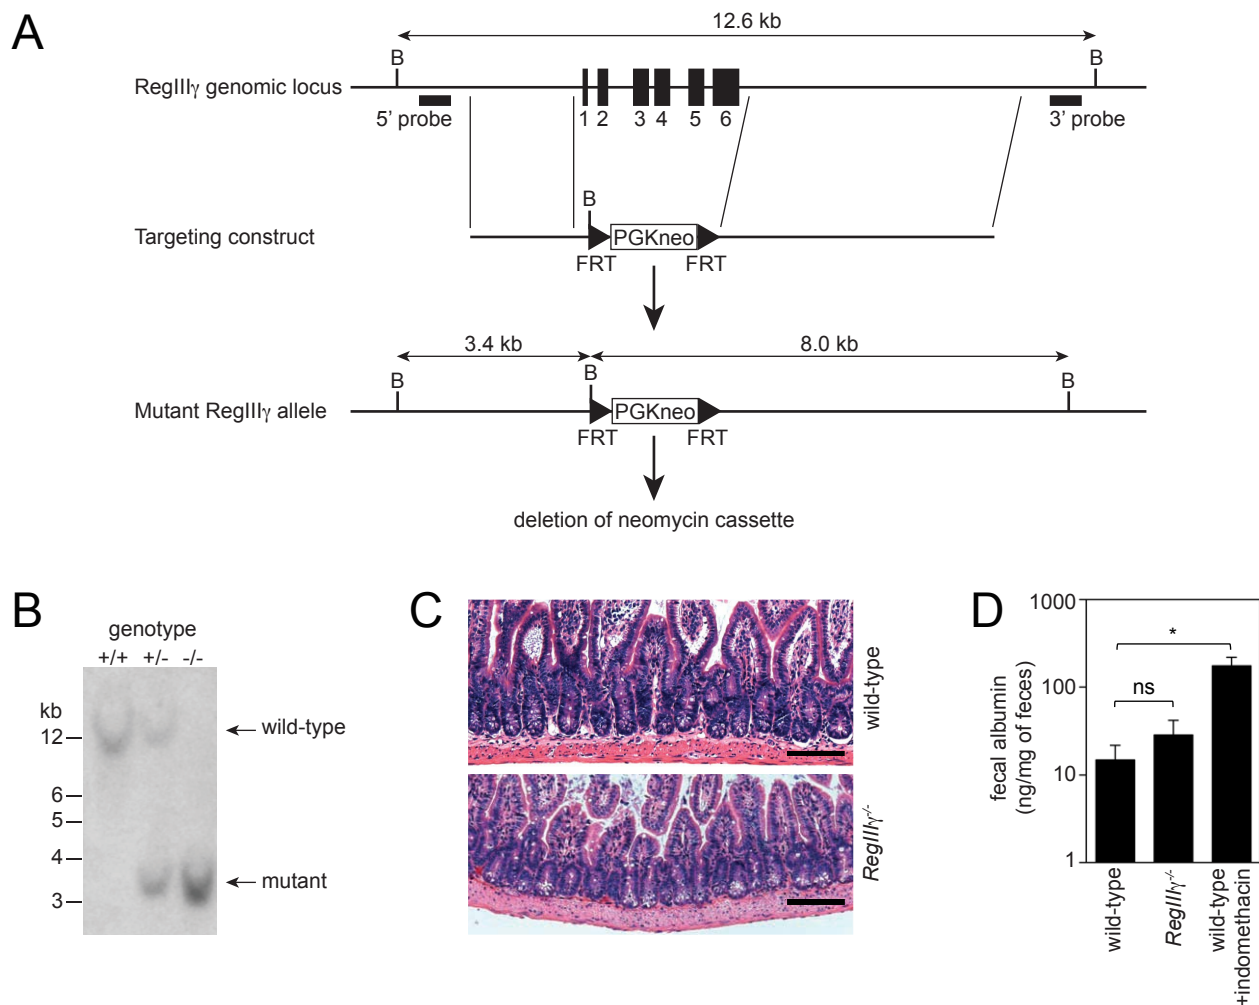

**Figure S5: Targeted disruption of the *RegIII $\gamma$*  gene by homologous recombination.**

(A) The endogenous *RegIII $\gamma$*  locus, targeting construct, and targeted locus are shown. Exons are represented by numbered black boxes. The targeting construct was designed to replace all 6 exons with a neomycin resistance gene (PGKneo) flanked by FRT sites. Bam HI (B) digestion of the endogenous locus generates a 12.6 kb fragment that is detected by the 5' probe. In correctly targeted clones, this probe detects a 3.4 kb fragment. PGKneo, neomycin resistance cassette. The PGKneo cassette, flanked by FRT sites, was deleted by intercrossing *RegIII $\gamma$ <sup>+/-</sup>* mice with transgenic “deletor” mice that constitutively express FLP recombinase. Following neomycin cassette deletion, *RegIII $\gamma$ <sup>+/-</sup>* mice were backcrossed for 8 generations to C57BL/6 mice. Experimental animals were generated from *RegIII $\gamma$ <sup>+/-</sup>* intercrosses and all experiments were performed on co-housed *RegIII $\gamma$ <sup>-/-</sup>* and *RegIII $\gamma$ <sup>+/-</sup>* littermates.

(B) Southern blot analysis of the targeted *RegIII $\gamma$*  locus. The 5' probe shown in (A) was hybridized to BamHI-digested genomic DNA from the offspring of intercrossed *RegIII $\gamma$ <sup>+/-</sup>* mice. Wild-type and mutant alleles are marked by 12.6 and 3.4 kb bands, respectively.

(C) *RegIII $\gamma$ <sup>-/-</sup>* mice do not show signs of overt intestinal pathology. Small intestines from *RegIII $\gamma$ <sup>-/-</sup>* mice and their co-housed wild-type littermates were prepared in Bouin's fixative, paraffin-embedded, sectioned, and stained with hematoxylin and eosin. Scale bar=100  $\mu$ m.

(D) Intestinal permeability of *RegIII $\gamma$ <sup>-/-</sup>* mice was measured by measuring serum protein loss into the intestinal lumen. Wild-type and *RegIII $\gamma$ <sup>-/-</sup>* littermates were analyzed by enzyme-linked immunosorbent assay (ELISA) for fecal albumin. As a positive control, one group of wild-type mice was pre-treated with indomethacin (7.5 mg/kg) for 24 hours to increase intestinal permeability. N=3-4 mice per group; \*,  $p < 0.05$ ; Error bars,  $\pm$ SEM; ns, not significant.

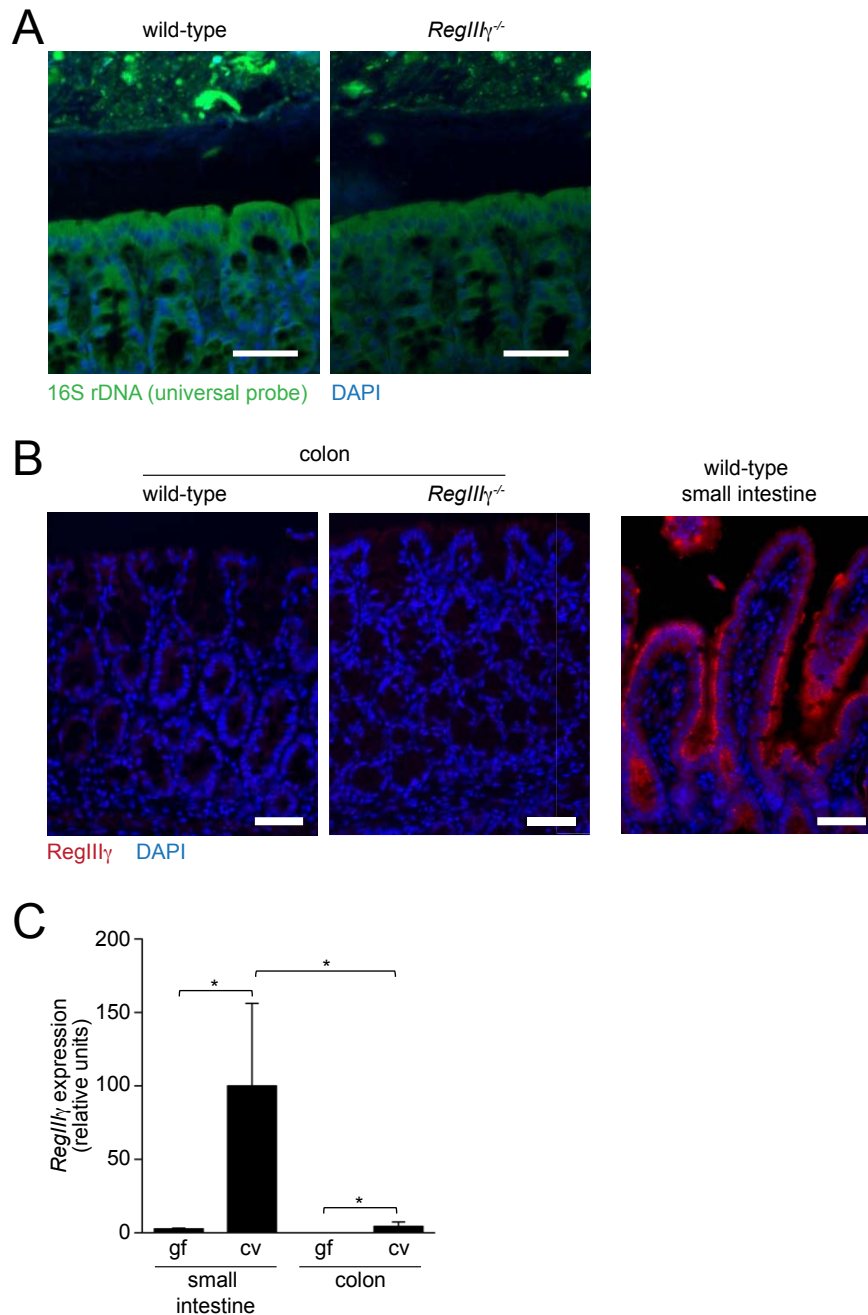

**Figure S6: Analysis of spatial relationships between host and microbiota in the colons of *RegIIIγ*<sup>-/-</sup> mice.**

(A) FISH analysis of microbiota localization in colon using a universal bacterial 16S rRNA gene probe. Scale bars=50 μm. (B) *RegIIIγ* was detected in colon with anti-*RegIIIγ* antiserum (13)(red). Nuclei were counterstained with DAPI (blue). A section of wild-type small intestine is stained for comparison. Scale bars=50 μm. (C) Q-PCR quantification of *RegIIIγ* transcripts in small intestine and colon. Expression levels in conventionally-raised (cv) mice are compared to those in germ-free (gf) mice, which lack a microbiota. N=4 mice per group. Statistical significance was determined by the Mann-Whitney test. \*, p<0.05; error bars, ±SEM.

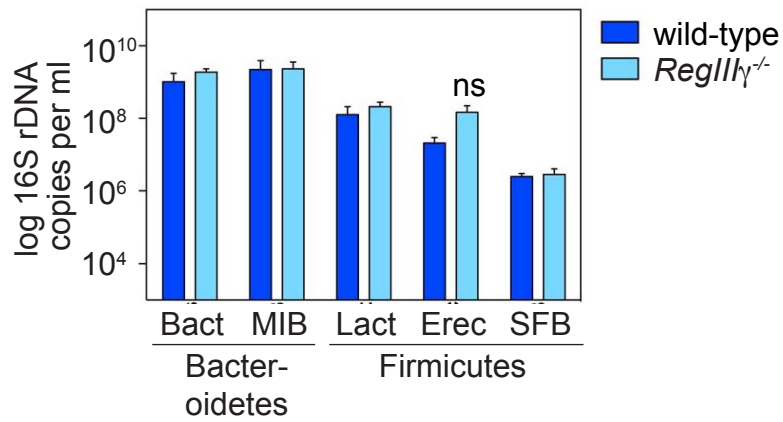

**Figure S7: Analysis of luminal microbiota in *RegIIIγ*<sup>-/-</sup> mice.**

Quantification of total ileal luminal bacteria by Q-PCR determination of 16S rRNA gene copy number. Mice were co-housed littermates from heterozygous crosses. N=5-7 mice/genotype from five littermate groups. ns, not significant.



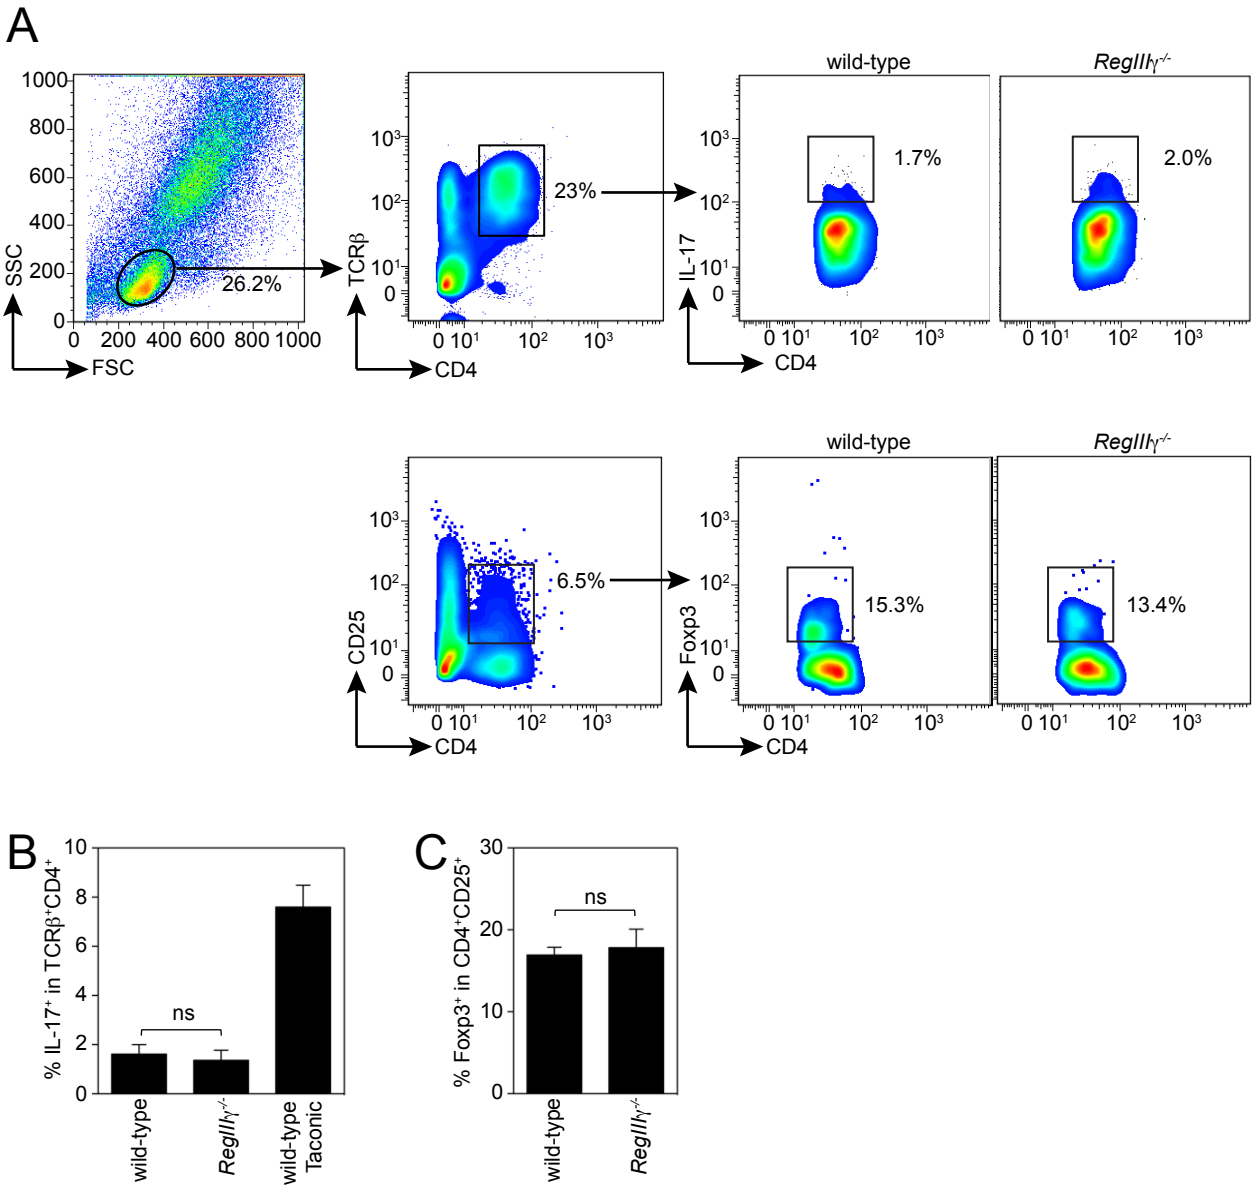

**Figure S8: Enumeration of Th17 and Treg cells in *RegIIIγ*<sup>-/-</sup> mice.**

(A) Small intestinal lamina propria cells were isolated from *RegIIIγ*<sup>-/-</sup> mice and their co-housed wild-type littermates at 4-5 weeks of age. For enumeration of Th17 cells, the cells were gated on TCRβ and CD4, and IL-17<sup>+</sup> cells were quantified as a percentage of this population. Wild-type mice from Taconic Farms were included as a positive control for Th17 cell isolations (2). Treg cells were enumerated by gating on CD25 and CD4, and Foxp3<sup>+</sup> cells were quantified as a percentage of this population. The IL-17 and Foxp3 gates were determined based on isotype controls. Representative FACS plots are shown. (B) IL-17<sup>+</sup> cells as a percentage of the TCRβ<sup>+</sup>CD4<sup>+</sup> cell population. N=4-6 mice per group from 2-3 littermate groups. (C) Foxp3<sup>+</sup> cells as a percentage of the CD4<sup>+</sup>CD25<sup>+</sup> cell population. N=3 mice per group from two littermate groups. ns, not significant.
